# Supplementary material for: Psychometric properties of the Automatic Thoughts Questionnaire-8 in two Spanish nonclinical samples
Source: PeerJ. 2020 Sep 16;8:e9747. doi: 10.7717/peerj.9747 (PMC7501798; doi:10.7717/peerj.9747)
Supplement: Supplemental Information 1 [file peerj-08-9747-s001.xlsx]

## Sheet: Sheet1
Sample	Age	Gender	ATQ1	ATQ2	ATQ3	ATQ4	ATQ5	ATQ6	ATQ7	ATQ8
1	30	1	2	1	2	1	1	2	1	1
1	46	2	1	1	2	1	2	3	2	1
1	21	2	2	2	1	1	1	5	3	2
1	44	2	4	5	4	5	4	4	4	3
1	22	#NULL!	3	1	2	1	1	2	1	1
1	40	2	1	1	1	1	1	2	1	1
1	#NULL!	1	3	4	4	2	2	4	3	4
1	50	1	2	2	2	1	2	3	2	2
1	35	2	1	1	3	1	3	5	5	3
1	19	1	1	1	3	1	1	2	1	1
1	20	2	2	5	5	4	5	5	3	4
1	46	2	3	3	3	2	2	5	5	4
1	46	#NULL!	2	1	2	1	1	2	1	1
1	21	2	3	4	3	4	5	5	4	5
1	#NULL!	1	1	1	1	1	1	2	1	1
1	31	2	2	1	2	1	1	2	1	1
1	69	#NULL!	1	4	5	4	3	3	5	2
1	31	2	4	4	3	2	2	3	2	3
1	55	2	3	1	1	2	1	2	1	1
1	18	2	5	4	5	3	4	4	4	3
1	23	2	1	3	5	5	3	5	4	4
1	32	2	1	1	2	1	1	2	1	4
1	44	2	1	1	1	1	5	5	5	2
1	24	2	3	1	3	1	1	2	1	1
1	34	#NULL!	3	2	4	2	1	5	2	2
1	23	2	1	1	2	1	1	1	1	1
1	25	1	1	2	4	1	1	3	1	1
1	27	2	1	1	1	1	1	2	1	1
1	28	2	1	1	2	1	2	2	2	2
1	25	2	1	1	3	1	1	4	2	2
1	47	2	1	1	1	1	1	2	1	1
1	19	2	2	1	3	3	1	5	1	3
1	49	2	2	1	2	1	2	2	2	2
1	40	2	1	1	1	1	3	4	1	2
1	46	2	1	2	1	1	2	4	2	3
1	50	2	2	2	2	1	2	4	2	2
1	22	2	4	4	2	2	2	5	2	5
1	29	2	2	3	3	3	2	4	4	2
1	45	2	1	1	3	1	3	5	4	2
1	#NULL!	2	2	2	2	2	2	4	3	2
1	39	2	1	1	2	1	1	3	4	4
1	25	2	1	5	2	5	3	3	4	5
1	18	2	1	1	2	1	2	3	1	1
1	25	2	1	1	2	1	2	3	1	1
1	23	2	3	1	1	1	1	3	1	1
1	28	2	4	4	4	4	4	5	4	2
1	18	2	2	4	4	1	5	5	2	1
1	30	2	3	2	3	2	3	4	2	2
1	37	#NULL!	1	1	1	1	2	3	1	3
1	41	2	1	1	4	1	3	5	4	5
1	42	2	1	1	1	1	1	2	1	2
1	34	2	1	1	2	1	1	2	2	2
1	30	1	2	1	2	1	1	2	1	1
1	18	2	4	4	4	4	2	2	1	2
1	47	2	3	3	4	3	5	5	4	1
1	56	#NULL!	1	1	4	1	1	5	2	1
1	36	2	3	1	3	1	3	3	1	2
1	38	2	1	1	3	4	4	4	3	3
1	36	1	2	1	2	1	1	3	2	1
1	26	2	2	2	4	2	4	5	4	2
1	57	1	1	1	1	1	1	1	1	1
1	41	2	1	1	2	1	2	4	3	2
1	41	2	1	1	2	1	1	3	2	2
1	19	1	3	3	4	4	3	4	3	5
1	43	2	4	1	2	1	1	2	1	2
1	43	2	1	1	1	1	1	1	1	1
1	50	1	1	1	1	1	2	2	1	1
1	45	2	1	1	1	1	1	2	1	2
1	44	2	1	1	1	1	2	2	2	1
1	49	2	2	2	2	1	4	4	4	3
1	36	2	1	1	2	1	1	3	2	1
1	52	2	2	3	3	2	2	4	2	1
1	52	2	1	1	1	1	1	2	1	1
1	58	#NULL!	1	1	2	1	2	2	3	1
1	50	2	1	2	4	1	4	4	2	1
1	30	2	2	3	4	4	5	5	5	2
1	38	2	2	2	3	1	1	2	2	1
1	46	2	5	2	2	1	4	4	2	4
1	25	2	3	1	4	1	3	4	2	1
1	50	2	2	2	3	4	2	4	3	3
1	39	2	2	1	2	1	1	2	2	2
1	32	2	1	1	1	1	1	2	1	2
1	31	#NULL!	2	4	2	4	4	4	4	4
1	43	2	1	3	3	3	4	4	4	4
1	22	1	1	1	1	1	1	1	1	1
1	49	2	2	2	2	2	2	2	4	4
1	40	2	3	4	5	3	3	4	4	4
1	48	2	2	1	1	1	1	1	1	1
1	31	1	3	2	4	2	4	4	5	1
1	42	2	2	1	1	1	2	3	3	1
1	51	2	1	1	2	1	4	4	4	2
1	25	2	2	2	3	3	3	4	3	1
1	#NULL!	1	1	1	1	1	1	1	1	1
1	18	2	2	2	3	2	4	4	5	5
1	26	2	1	1	3	1	4	4	5	1
1	42	#NULL!	4	3	3	3	4	5	5	4
1	28	1	3	3	2	3	3	4	4	3
1	27	2	3	1	4	1	2	4	3	1
1	40	2	2	2	2	1	2	3	2	1
1	27	2	5	5	4	4	4	5	5	4
1	25	2	1	1	1	1	1	2	1	2
1	31	2	5	5	5	5	5	3	5	5
1	25	2	2	2	5	2	3	5	5	5
1	38	2	2	1	2	1	1	3	1	1
1	51	2	1	1	1	1	2	2	1	1
1	38	1	2	1	2	1	1	2	1	1
1	#NULL!	2	4	5	4	2	4	4	5	4
1	28	2	3	4	5	4	3	5	5	4
1	26	2	2	2	3	2	3	4	3	1
1	55	2	1	1	2	1	1	2	2	2
1	30	2	2	1	1	1	1	2	1	1
1	26	2	2	2	2	1	1	2	1	2
1	57	1	1	1	1	1	1	3	1	1
1	23	2	2	1	1	1	1	3	3	2
1	31	1	1	1	1	1	1	2	1	1
1	72	2	1	1	2	1	1	2	1	1
1	33	2	1	1	2	1	1	2	1	1
1	50	#NULL!	1	1	1	1	2	2	1	1
1	25	2	2	1	2	1	2	3	4	2
1	22	2	3	3	5	2	5	5	5	2
1	19	2	2	1	2	1	2	2	2	1
1	57	1	1	2	2	1	2	4	2	2
1	25	2	2	1	5	1	2	5	5	2
1	32	2	2	2	2	1	1	2	1	1
1	23	1	1	1	2	1	2	4	2	1
1	43	2	1	1	1	1	1	4	4	1
1	36	2	1	1	1	1	1	2	1	1
1	47	2	1	1	1	1	2	2	2	2
1	48	2	1	1	2	1	2	3	1	4
1	40	2	2	1	1	1	2	2	2	1
1	41	1	1	1	1	1	1	2	1	1
1	47	#NULL!	2	1	3	1	3	4	2	3
1	37	2	4	4	5	5	3	5	5	2
1	45	2	1	1	1	1	1	2	1	1
1	27	2	1	1	3	1	1	4	1	1
1	19	2	4	1	3	2	1	5	2	2
1	20	1	2	1	1	1	2	2	1	2
1	37	2	1	1	1	1	1	2	1	1
1	22	2	2	2	4	2	2	4	4	2
1	20	2	2	1	3	1	1	3	1	1
1	20	2	2	2	2	1	2	3	1	1
1	41	1	2	1	2	1	2	3	1	2
1	26	1	1	1	1	1	1	2	1	1
1	22	2	1	1	3	1	1	3	1	3
1	27	1	2	2	3	4	4	4	4	4
1	35	2	1	2	2	1	1	3	1	1
1	#NULL!	#NULL!	2	1	3	1	3	3	3	1
1	37	1	2	2	2	2	2	2	1	2
1	45	2	1	1	1	1	2	2	1	2
1	37	2	2	1	2	1	1	2	1	2
1	27	2	3	2	2	1	4	5	2	3
1	26	2	1	1	2	2	1	4	4	2
1	43	2	2	1	2	1	1	3	1	2
1	35	1	2	2	3	1	2	4	2	4
1	28	2	1	2	4	1	4	5	5	4
1	46	2	1	1	1	1	1	2	1	1
1	33	2	3	4	4	4	4	5	4	4
1	50	2	1	1	1	1	1	1	1	1
1	22	2	1	1	3	1	2	4	2	1
1	51	1	1	1	1	1	1	1	1	1
1	21	2	3	2	1	4	2	4	1	1
1	44	2	2	1	2	1	2	2	1	1
1	52	2	1	2	3	2	2	2	2	2
1	32	2	1	1	2	1	1	3	3	2
1	26	2	2	1	2	1	1	2	1	1
1	30	2	2	4	1	2	3	4	3	1
1	28	1	3	3	2	2	4	4	4	5
1	#NULL!	2	2	3	3	5	4	5	5	5
1	41	2	1	2	1	1	1	3	1	1
1	24	2	4	3	3	3	2	4	2	4
1	39	2	1	1	2	1	2	3	1	1
1	46	1	1	2	2	1	2	4	3	2
1	29	2	1	1	1	1	2	2	1	1
1	53	2	1	1	1	1	1	3	2	1
1	42	2	2	1	1	1	1	2	1	1
1	46	2	2	1	4	1	2	5	4	3
1	60	1	1	1	1	1	1	2	1	1
1	43	2	2	1	2	1	3	4	1	1
1	23	2	4	3	4	5	3	4	3	2
1	49	2	3	2	4	2	3	4	4	2
1	46	2	4	5	5	5	5	5	5	1
1	53	2	1	1	1	1	1	2	1	1
1	36	2	2	1	1	1	2	2	1	1
1	50	2	2	1	2	1	2	2	2	3
1	25	2	2	1	2	1	2	2	1	1
1	49	1	1	2	3	1	2	4	3	2
1	27	2	2	2	2	1	2	2	1	1
1	32	2	1	1	2	1	3	4	4	2
1	35	1	2	1	1	1	1	1	1	1
1	33	2	2	2	2	2	2	3	2	2
1	52	2	4	3	3	2	3	4	3	2
1	51	2	2	2	2	1	2	2	3	3
1	28	2	4	4	4	4	4	4	3	5
1	23	2	2	1	1	1	1	2	1	1
1	#NULL!	2	1	1	3	1	1	3	4	1
1	21	2	2	2	4	3	4	4	5	4
1	33	#NULL!	2	1	1	1	1	1	2	1
1	34	2	1	1	1	1	3	3	4	2
1	52	2	1	1	1	1	2	2	2	1
1	41	2	1	1	1	1	2	2	1	1
1	49	2	2	2	2	1	1	2	2	2
1	42	2	4	3	3	1	4	4	3	2
1	55	1	2	2	2	2	2	3	3	2
1	34	2	3	2	3	2	3	4	3	3
1	52	2	4	3	4	3	2	5	4	4
1	43	1	1	2	4	2	2	4	4	2
1	26	1	3	2	4	1	3	4	4	2
1	54	2	1	2	2	1	2	2	2	5
1	52	1	2	1	2	1	1	3	1	1
1	34	2	1	1	1	1	1	1	1	3
1	30	1	4	4	5	4	4	4	5	4
1	42	1	3	3	3	1	2	2	3	3
1	53	1	1	1	2	1	2	3	2	3
1	44	2	2	2	2	1	1	4	3	2
1	24	2	1	1	2	1	1	1	1	1
1	40	2	1	1	1	1	1	1	1	1
1	30	2	3	2	2	2	2	3	3	2
1	36	2	1	1	1	1	1	2	1	1
1	30	2	2	1	1	1	1	1	1	1
1	25	2	2	2	2	1	1	4	3	2
1	31	2	2	2	3	1	2	4	3	2
1	28	2	1	1	1	1	1	2	3	1
1	30	2	1	1	1	1	1	3	1	1
1	22	2	2	1	3	1	4	4	2	1
1	27	2	2	1	2	1	1	4	4	3
1	23	2	1	3	3	3	2	4	2	4
1	22	2	2	2	3	3	3	3	1	1
1	31	2	2	2	2	1	1	2	2	2
1	24	2	2	3	3	2	3	4	2	1
1	31	2	3	3	4	2	4	5	4	1
1	32	2	1	1	1	1	1	3	1	1
1	36	2	4	3	3	1	1	3	3	4
1	35	1	2	1	1	1	2	2	1	1
1	41	2	1	1	1	1	1	2	1	1
1	41	2	1	1	3	1	3	3	3	2
1	38	2	3	5	4	4	3	5	4	2
1	34	2	1	1	1	1	1	1	1	1
1	43	1	1	1	1	1	1	1	1	1
1	40	2	1	1	2	3	3	2	1	1
1	54	2	3	1	3	1	2	3	2	2
1	38	2	1	2	1	1	2	3	1	1
1	34	2	1	1	1	1	1	1	1	1
1	36	1	1	1	2	1	2	3	3	1
1	35	2	1	1	2	1	1	2	1	2
1	45	2	1	1	2	1	2	2	2	3
1	36	#NULL!	2	1	2	2	2	5	4	4
1	38	2	1	1	2	1	1	2	2	1
1	36	2	2	2	1	1	2	2	1	2
1	42	2	2	2	2	1	2	5	4	4
1	57	2	1	1	1	1	1	1	1	1
1	18	2	3	2	1	1	1	4	1	1
1	35	2	2	1	1	2	1	1	1	1
1	30	2	3	2	2	1	2	4	4	3
1	58	2	1	1	1	1	1	2	1	1
1	35	2	1	1	1	1	2	1	1	1
1	35	2	5	1	2	1	1	4	3	2
1	42	2	1	1	1	1	1	1	1	1
1	32	2	2	2	2	1	1	2	1	1
1	37	1	1	1	1	1	2	2	1	2
1	40	2	3	4	4	4	3	5	4	2
1	41	2	1	1	2	1	1	3	1	1
1	24	1	3	3	3	3	4	2	2	1
1	30	1	1	1	1	1	1	2	2	1
1	42	2	1	1	1	1	1	2	1	1
1	57	2	1	1	2	1	1	2	1	1
1	32	2	4	3	4	3	2	5	3	4
1	44	2	1	1	2	1	2	3	4	1
1	25	2	1	1	2	1	2	3	1	1
1	24	2	2	1	2	3	3	4	4	2
1	45	2	1	1	1	1	1	2	2	1
1	22	2	2	2	2	1	1	5	3	2
1	40	2	1	1	2	2	1	4	2	2
1	42	1	1	1	1	1	1	1	1	1
1	42	2	2	1	2	2	4	4	4	1
1	63	2	4	2	3	2	1	4	1	2
1	21	2	1	1	3	1	2	5	4	2
1	37	2	1	1	1	1	1	2	2	1
1	59	2	5	5	5	5	4	4	4	4
1	36	2	2	2	2	2	2	2	2	2
1	22	2	1	1	2	1	1	2	1	1
1	28	2	1	1	2	1	2	1	1	2
1	32	2	1	1	2	1	1	2	2	2
1	52	2	2	1	1	1	2	2	2	1
1	34	2	4	3	5	2	2	5	3	2
1	21	2	2	2	4	1	2	4	2	1
1	46	2	1	1	1	1	1	2	2	4
1	61	1	1	1	1	1	1	2	2	2
1	60	1	2	1	3	1	1	3	2	1
1	33	1	1	1	1	1	1	4	1	2
1	28	1	1	2	2	2	2	4	3	2
1	21	1	2	1	2	3	5	5	4	1
1	52	2	1	1	1	1	2	2	2	1
1	26	2	1	1	2	1	2	3	1	1
1	38	2	1	1	1	1	1	2	1	1
1	40	2	1	1	2	1	1	2	1	1
1	37	2	2	1	2	1	1	3	3	2
1	32	2	3	1	5	1	4	5	5	5
1	26	2	2	2	2	2	2	2	2	1
1	49	1	2	1	2	1	1	3	1	1
1	34	1	2	2	2	2	2	3	3	2
1	47	#NULL!	5	2	4	1	1	3	1	1
1	30	2	1	1	1	1	1	2	1	1
1	38	2	1	1	1	1	1	2	1	1
1	39	2	1	1	1	1	1	1	1	1
1	55	1	3	2	2	4	4	4	5	4
1	26	1	4	1	4	1	3	5	5	1
1	45	#NULL!	2	1	1	1	1	2	2	2
1	28	#NULL!	1	1	2	1	1	4	1	1
1	27	2	3	2	4	1	4	5	4	2
1	31	1	2	4	3	3	2	2	5	4
1	24	2	1	1	1	1	2	3	2	1
1	53	2	2	2	2	2	2	2	2	2
1	42	2	1	1	2	1	1	2	1	2
1	28	2	2	1	1	1	1	2	2	1
1	52	2	2	2	2	1	2	2	2	2
1	30	1	1	1	1	1	1	4	3	3
1	34	2	1	1	2	1	1	3	1	3
1	26	2	1	1	2	1	1	2	1	1
1	38	2	3	2	2	1	1	4	2	1
1	48	1	2	1	1	1	1	2	1	1
1	57	2	1	1	2	1	1	2	1	2
1	46	2	1	1	2	1	1	1	2	1
1	32	2	1	1	2	1	1	2	1	2
1	53	1	1	1	2	1	1	2	1	2
1	35	2	3	2	2	1	1	3	3	1
1	31	2	2	2	2	2	1	3	2	2
1	36	#NULL!	2	1	1	1	1	1	1	1
1	46	2	2	2	2	1	1	2	2	1
1	67	1	1	1	2	1	2	3	1	2
1	32	2	1	1	2	1	2	3	3	4
1	41	2	1	1	1	1	1	2	1	1
1	35	1	1	1	1	1	1	2	1	1
1	30	2	2	1	1	1	1	1	1	2
1	28	2	3	1	3	2	2	5	5	3
1	33	1	2	1	2	1	1	3	1	1
1	67	2	1	1	3	3	4	4	4	4
1	39	1	3	1	1	1	1	2	2	2
1	38	1	2	3	2	2	2	2	1	2
1	36	2	2	2	2	2	4	4	3	2
1	38	2	2	1	1	1	2	2	1	1
1	22	2	1	1	1	1	1	1	1	1
1	60	2	1	1	2	1	2	2	2	1
1	32	1	1	3	2	1	2	3	1	2
1	40	1	1	1	1	1	1	1	1	1
1	23	2	3	1	2	3	2	4	1	2
1	32	2	2	1	1	1	1	2	1	2
1	36	1	1	1	3	1	1	3	1	2
1	56	2	1	1	1	1	1	2	1	1
1	45	1	3	2	4	2	4	5	4	2
1	28	1	1	1	1	1	1	3	2	1
1	50	1	1	1	1	1	1	2	1	2
1	56	1	2	2	3	2	2	3	2	1
1	62	2	1	1	2	2	2	2	2	2
1	20	2	1	1	2	1	1	2	3	1
1	47	1	1	2	4	2	3	4	3	2
1	35	2	1	2	2	1	2	2	1	2
1	29	#NULL!	4	1	3	2	3	3	1	1
1	39	2	2	2	2	2	2	4	3	2
1	37	1	1	2	2	1	2	3	2	1
1	56	2	1	1	1	1	1	1	1	2
1	41	2	1	2	3	1	1	4	1	1
1	59	2	3	3	4	3	2	3	3	2
1	25	2	3	1	3	1	4	5	3	1
1	35	2	2	2	2	1	2	2	2	2
1	49	2	2	1	2	1	1	2	1	1
1	34	#NULL!	1	1	2	2	2	3	2	2
1	33	2	2	3	2	2	4	4	2	3
1	27	2	4	3	3	3	4	5	5	3
1	28	2	2	2	3	1	3	5	2	2
1	24	2	2	1	2	1	1	3	2	4
1	48	2	1	1	2	2	1	2	2	2
1	30	2	2	1	2	1	1	2	2	2
1	42	2	1	1	2	1	1	2	1	1
1	28	2	2	2	2	2	2	2	2	2
1	45	1	2	3	4	4	1	4	2	1
1	56	2	1	1	1	1	1	1	1	1
1	56	2	4	2	2	4	4	2	4	4
1	37	#NULL!	1	1	1	2	2	2	1	2
1	35	2	1	1	3	1	1	3	2	2
1	38	2	5	1	1	1	1	1	1	1
1	50	2	1	1	1	1	1	1	1	1
1	34	2	2	1	1	1	2	3	2	1
1	23	2	1	1	1	1	2	2	2	1
1	30	2	3	3	2	2	3	3	2	1
1	24	1	1	2	3	2	2	5	2	5
1	27	2	3	1	4	2	4	5	3	2
1	30	2	2	2	2	2	2	2	2	2
1	41	2	1	1	1	1	1	3	3	1
1	30	2	4	4	4	3	4	5	5	5
1	27	1	2	1	2	1	1	2	1	1
1	25	1	4	4	5	2	4	4	4	3
1	29	2	4	3	5	4	4	5	5	4
1	34	2	3	1	1	1	1	4	1	1
1	33	2	1	1	1	1	1	2	1	1
1	32	2	2	1	1	1	1	2	4	1
1	28	2	3	2	2	3	4	4	4	4
1	29	2	1	1	2	1	3	3	3	1
1	27	#NULL!	4	4	3	4	4	3	2	1
1	39	2	1	2	1	2	2	4	1	4
1	32	2	3	2	3	2	2	2	2	1
1	36	2	1	1	1	1	1	2	1	1
1	31	2	1	1	1	1	1	3	1	1
1	39	#NULL!	1	1	2	1	2	2	2	1
1	38	2	2	1	2	1	1	2	1	1
1	30	2	1	1	1	2	5	5	5	1
1	30	2	2	2	2	1	2	3	2	2
1	22	2	4	4	4	4	4	4	4	4
1	38	2	2	1	2	1	2	2	1	3
1	57	1	1	2	2	1	2	2	1	2
1	33	2	2	3	2	1	2	3	3	2
1	41	2	2	1	1	1	1	3	1	1
1	38	2	2	1	2	1	1	4	1	1
1	32	2	4	4	5	3	5	5	3	3
1	37	2	1	2	2	1	2	2	1	2
1	44	2	4	3	2	4	5	5	5	3
1	52	2	3	3	5	4	5	5	5	5
1	37	1	1	1	1	1	2	2	2	1
1	37	2	2	2	2	1	2	3	2	2
1	40	2	2	2	3	3	4	4	5	3
1	34	2	1	1	3	2	2	4	4	3
1	28	2	5	1	4	1	2	4	3	3
1	35	2	1	1	1	1	1	3	2	1
1	38	2	3	2	4	3	4	5	4	4
1	28	2	2	1	1	1	1	2	1	1
1	33	2	2	2	2	2	2	4	3	4
1	44	2	1	1	2	1	2	2	3	2
1	30	2	1	1	1	1	1	1	1	1
1	40	1	2	4	4	4	3	5	5	5
1	39	2	1	1	1	1	4	3	1	1
1	37	#NULL!	1	1	1	1	1	2	1	2
1	29	2	2	1	2	1	2	4	3	2
1	33	2	1	1	3	1	4	3	2	1
1	30	2	2	1	5	1	4	5	4	1
1	37	2	2	1	2	1	1	2	1	2
1	36	2	2	1	2	1	1	3	2	1
1	30	2	1	1	4	1	2	4	3	1
1	36	1	1	1	1	1	1	4	3	1
1	32	2	1	1	1	1	1	2	1	1
1	72	1	2	1	2	1	1	1	1	3
1	34	2	2	1	2	2	2	2	2	1
1	56	1	2	1	1	2	1	2	2	1
1	37	2	2	4	4	1	2	4	1	5
1	33	2	1	1	1	1	1	4	2	2
1	32	2	2	2	2	2	4	4	4	3
1	35	1	1	1	2	1	1	2	1	1
1	33	#NULL!	2	2	2	1	1	3	2	2
1	41	1	1	1	2	1	1	2	1	1
1	23	2	1	1	1	1	1	3	2	2
1	31	2	1	1	2	1	1	2	1	1
1	37	2	1	1	1	1	1	2	2	1
1	44	1	1	1	1	1	1	2	2	2
1	41	2	4	4	4	3	3	3	3	2
1	28	2	1	1	4	2	1	3	1	1
1	40	1	4	4	4	2	1	5	3	2
1	39	2	2	1	2	1	1	2	1	1
1	34	2	2	2	2	1	2	4	4	4
1	54	#NULL!	2	2	5	1	2	4	1	2
1	34	2	1	1	2	1	2	2	1	1
1	30	2	3	2	2	2	2	2	2	2
1	35	2	2	2	2	2	2	4	4	4
1	35	2	3	1	1	1	1	3	1	1
1	35	2	1	1	2	2	4	4	2	2
1	35	2	1	2	1	1	2	3	3	1
1	36	2	1	1	2	1	1	2	1	1
1	39	2	2	3	3	3	3	4	5	4
1	34	2	1	1	1	1	1	2	2	1
1	44	1	2	1	3	2	4	5	3	4
1	40	1	2	1	2	3	1	3	1	4
1	39	2	4	3	4	1	2	2	2	2
1	39	2	3	2	3	3	4	3	2	2
1	40	2	2	3	2	2	2	4	3	3
1	32	#NULL!	1	1	2	1	1	2	2	2
1	36	2	3	3	3	3	4	4	4	2
1	35	1	1	1	3	1	1	3	1	2
1	40	1	2	1	1	1	1	1	1	1
1	34	2	1	1	1	1	1	2	1	1
1	34	1	1	1	1	1	1	1	1	1
1	29	2	2	2	2	1	2	4	3	2
1	66	2	1	1	1	1	1	1	1	1
1	33	2	1	2	1	2	1	2	1	4
1	30	1	1	1	1	1	1	1	1	1
1	22	2	2	1	4	1	2	3	1	1
1	51	2	2	1	2	1	1	2	1	1
1	47	1	2	1	3	1	2	4	2	1
1	23	2	2	1	3	1	2	3	2	1
1	40	2	2	1	1	1	1	2	1	1
1	27	2	4	1	4	2	2	4	4	2
1	20	2	2	1	1	1	1	1	1	2
1	55	2	1	1	1	1	1	2	1	2
1	43	2	2	1	2	1	1	2	1	1
1	42	2	1	1	1	1	2	2	2	1
1	22	2	3	1	3	1	3	4	3	2
1	34	2	3	4	4	4	4	4	3	4
1	25	1	4	4	4	2	4	4	1	2
1	21	2	2	1	3	1	4	3	2	1
1	47	2	4	2	4	2	4	4	3	3
1	57	2	1	1	1	1	1	1	1	1
1	20	2	2	1	3	3	2	1	1	2
1	33	2	4	3	4	1	2	4	4	1
1	27	2	1	1	1	1	1	1	1	1
1	37	2	1	1	1	1	1	2	1	2
1	24	2	1	1	2	1	2	4	3	2
1	51	2	5	2	2	1	2	2	1	2
1	26	1	2	1	2	1	1	3	2	1
1	30	2	2	1	2	1	2	5	5	3
1	26	2	2	1	2	1	2	2	1	1
1	20	2	2	1	1	1	1	2	1	1
1	24	2	3	2	2	1	3	2	3	1
1	20	2	1	1	1	1	1	2	1	1
1	38	2	1	1	1	1	1	2	1	1
1	22	1	1	1	1	1	1	2	1	2
1	24	2	2	2	2	1	2	3	1	1
1	21	2	2	1	3	1	3	4	4	1
1	20	2	1	1	1	1	1	2	1	1
1	20	2	2	1	2	2	2	4	2	2
1	20	2	2	2	2	1	2	3	1	1
1	41	#NULL!	2	2	3	1	1	3	2	2
1	32	1	2	1	1	1	1	4	1	4
1	25	2	2	1	2	1	2	3	2	2
1	22	2	2	1	1	1	2	3	3	1
1	30	#NULL!	1	1	1	1	1	4	1	1
1	30	2	4	4	4	4	2	5	4	5
1	21	2	1	1	2	1	1	4	1	1
1	20	#NULL!	1	1	1	1	1	1	1	1
1	26	2	1	3	4	3	4	4	4	5
1	30	2	1	1	1	1	1	4	4	3
1	28	2	2	1	1	1	1	2	2	1
1	25	1	2	1	2	2	2	3	1	2
1	29	2	2	3	3	2	2	3	2	2
1	20	2	1	1	2	1	2	2	1	1
1	23	2	2	1	1	1	1	4	4	3
1	34	1	2	1	2	1	1	3	2	1
1	42	1	2	1	1	1	1	2	1	2
1	48	2	2	1	2	1	1	2	1	1
1	23	2	1	2	2	1	2	3	1	2
1	37	2	1	1	1	1	1	3	1	1
1	22	2	4	4	3	5	4	3	3	1
1	30	2	1	1	3	1	2	3	2	2
1	21	2	1	1	1	1	2	2	2	2
1	60	2	1	1	1	1	1	1	1	1
1	33	1	2	1	2	1	1	2	3	2
1	45	2	1	1	1	1	1	1	1	1
1	19	1	3	3	4	4	3	4	4	3
1	42	2	1	1	2	1	1	3	2	2
1	36	1	1	1	1	1	1	2	1	2
1	40	2	1	1	1	1	1	2	1	1
1	66	2	1	1	1	1	1	1	1	1
1	43	2	3	2	4	1	2	4	2	2
1	47	2	2	1	2	1	1	3	1	1
1	54	1	1	1	1	1	1	2	1	2
1	19	2	2	2	2	3	3	2	2	2
1	33	1	1	1	1	1	1	2	1	2
1	42	1	1	1	1	1	1	2	1	2
1	22	2	1	1	1	1	1	2	1	4
1	25	2	2	3	4	4	4	4	3	1
1	23	2	1	1	2	1	2	2	1	2
1	50	2	2	1	2	1	2	1	1	1
1	45	2	3	2	2	3	3	3	3	3
1	23	2	4	1	2	1	1	2	1	1
1	32	2	2	3	3	1	2	4	3	3
1	32	1	1	1	2	1	1	2	1	1
1	47	2	3	2	2	2	3	4	2	4
1	37	2	1	1	1	1	1	2	1	2
1	37	2	3	1	1	2	4	4	3	1
1	38	2	2	1	3	3	1	1	1	2
1	48	2	1	1	2	1	2	2	2	1
1	31	2	3	2	2	2	2	4	2	2
1	47	1	1	1	3	1	2	2	1	1
1	36	2	1	1	1	1	1	1	1	1
1	28	2	3	3	3	2	4	5	5	3
1	50	2	3	3	2	3	3	4	2	3
1	38	1	2	1	1	2	1	3	1	1
1	45	1	2	1	2	1	1	2	1	1
1	19	2	2	1	1	1	2	3	2	2
1	20	2	1	5	5	5	4	3	5	1
1	34	2	4	3	2	1	3	5	3	1
1	48	2	2	1	2	1	1	4	1	1
1	39	2	2	1	1	2	3	2	2	1
1	19	1	1	2	5	2	4	5	3	2
1	41	2	2	1	1	1	2	3	3	1
1	19	2	1	1	1	1	2	2	1	1
1	32	1	2	2	2	2	1	2	2	2
1	30	2	2	1	2	1	1	2	1	1
1	20	2	3	3	4	4	5	5	2	5
1	46	2	1	1	1	1	2	2	1	1
1	24	2	1	1	2	2	2	1	2	1
1	24	2	3	1	2	2	1	4	2	2
1	34	2	2	1	4	1	2	4	1	4
1	60	2	2	1	1	1	1	2	1	1
1	45	2	1	1	4	3	4	5	1	2
1	25	2	1	1	2	1	1	3	1	1
1	32	1	3	4	4	1	4	5	5	2
1	42	2	1	1	1	1	2	4	4	4
1	20	1	1	1	1	2	1	2	1	2
1	21	1	2	1	2	1	2	4	1	3
1	24	2	2	2	3	1	2	5	5	1
1	58	1	1	1	1	1	1	2	1	1
1	44	2	2	1	1	1	1	2	1	1
1	38	2	1	2	3	1	2	4	2	1
1	43	2	3	2	4	1	3	5	3	2
1	69	2	1	1	1	1	1	2	1	2
1	53	2	1	1	2	1	2	4	1	1
1	51	1	1	1	1	1	1	3	1	1
1	27	2	2	1	2	1	2	3	1	1
1	19	2	2	5	5	5	5	5	5	5
1	38	2	1	2	2	1	3	2	2	1
1	53	2	1	1	1	1	2	2	2	2
1	38	1	2	1	2	1	1	3	2	1
1	44	2	2	2	2	1	2	3	2	2
1	35	2	1	1	1	1	1	2	1	1
1	19	1	3	2	2	1	2	3	4	4
1	29	2	1	1	1	1	1	2	1	1
1	26	2	1	1	1	1	1	1	1	1
1	26	2	4	4	4	4	3	4	4	4
1	36	2	1	1	2	1	2	3	1	1
1	18	2	3	2	4	3	4	4	2	3
1	25	2	2	1	2	1	1	3	2	2
1	25	1	2	1	2	1	4	5	2	4
1	39	2	1	2	4	2	2	5	4	2
1	38	2	2	1	1	1	2	2	2	2
1	20	2	1	1	1	1	2	2	1	1
1	19	1	3	1	2	1	1	2	2	2
1	22	2	1	1	2	2	2	2	5	4
1	32	1	2	1	2	1	2	2	1	1
1	33	2	2	2	2	1	3	3	1	1
1	47	2	2	1	1	1	1	2	1	1
1	31	2	5	5	5	5	5	5	3	5
1	29	2	2	1	1	1	2	3	3	1
1	25	1	2	2	3	2	2	3	2	2
1	45	2	1	1	1	1	1	1	1	1
1	49	1	1	1	1	1	1	2	1	2
1	27	2	2	2	2	1	2	4	1	1
1	30	1	2	2	1	1	1	2	2	2
1	23	2	2	2	4	2	3	4	2	1
1	22	2	2	1	4	1	2	3	2	2
1	41	1	2	2	2	1	1	2	2	1
1	44	1	2	2	2	2	3	4	1	2
1	20	2	2	2	4	1	2	4	1	1
1	47	2	1	1	1	1	1	2	1	5
1	45	1	2	3	4	3	4	5	4	3
1	19	2	2	3	4	1	5	5	1	3
1	31	2	1	1	2	1	1	2	1	1
1	25	1	2	2	3	2	2	4	2	1
1	22	2	1	1	1	1	1	3	1	2
1	39	1	1	1	1	1	1	1	1	1
1	27	2	1	1	4	1	1	5	2	2
1	25	2	1	1	2	1	1	3	4	3
1	48	2	4	4	4	3	3	4	4	4
1	38	1	3	2	2	1	1	2	1	2
1	42	2	1	1	1	1	1	2	1	1
1	18	2	4	1	3	1	3	5	5	5
1	30	2	1	1	1	1	2	1	1	1
1	22	2	1	2	2	1	2	5	2	2
1	35	2	2	1	2	1	2	2	1	1
1	57	2	3	3	4	1	3	4	3	2
1	28	2	1	1	1	1	1	2	1	1
1	42	2	5	2	5	3	4	5	2	4
1	53	2	2	4	4	1	4	3	2	1
1	26	2	2	2	4	4	3	5	4	2
1	29	2	2	1	4	1	3	3	1	3
1	21	2	1	1	2	1	1	3	1	1
1	33	2	1	1	3	1	1	2	1	2
1	51	2	1	1	2	1	1	1	1	2
1	28	2	2	2	2	1	3	3	4	2
1	25	2	2	1	2	1	1	3	2	3
1	18	2	2	2	2	2	2	3	4	1
1	54	1	3	4	4	2	2	4	1	2
1	52	1	2	4	2	3	2	3	2	4
1	26	1	5	5	5	5	5	5	5	5
1	26	2	2	2	2	1	1	4	2	2
1	25	2	1	1	1	1	1	3	1	4
1	33	2	1	1	1	1	1	1	1	1
1	51	2	1	3	2	1	2	4	2	2
1	25	2	3	1	1	1	1	3	2	1
1	23	2	4	3	3	2	2	4	1	5
1	19	2	3	1	3	1	1	4	1	3
1	#NULL!	1	1	1	1	1	1	2	1	1
1	37	2	1	2	2	1	2	3	1	2
1	26	2	3	2	1	1	1	2	1	1
1	18	1	1	1	2	1	1	3	1	2
1	25	2	2	2	1	1	1	2	1	2
1	21	2	1	1	1	1	1	2	1	1
1	25	1	1	1	1	1	1	2	1	1
1	40	2	1	1	1	1	1	1	1	1
1	18	2	2	3	4	2	1	5	3	2
1	#NULL!	1	2	1	2	1	1	3	2	1
1	45	2	1	1	1	1	2	2	1	1
1	21	1	3	2	4	3	4	4	4	3
1	22	2	1	1	1	1	1	2	1	1
1	32	2	1	1	1	1	2	4	3	2
1	28	2	1	1	2	1	2	4	1	3
1	45	2	2	4	4	4	4	4	4	4
1	48	1	1	1	1	1	1	1	1	1
1	42	1	1	1	1	1	1	1	1	1
1	38	2	1	1	2	1	2	2	1	1
1	25	2	3	2	4	1	4	5	4	1
1	53	2	2	2	3	2	2	5	1	2
1	45	1	2	1	2	1	1	3	1	2
1	44	2	1	1	1	1	1	1	1	1
1	29	2	4	1	3	2	4	5	3	1
1	32	2	1	1	1	1	1	4	1	1
1	31	2	1	1	1	1	1	2	1	1
1	19	2	1	2	2	2	3	3	5	5
1	30	2	3	1	2	1	2	4	2	4
1	22	2	4	4	5	3	5	5	3	2
1	34	1	1	1	1	1	1	1	1	1
1	27	2	2	2	4	1	2	4	3	3
1	27	2	2	2	4	4	3	5	2	2
1	29	2	3	5	5	3	4	4	3	3
1	22	2	2	1	3	1	2	3	2	1
1	23	1	2	1	1	1	1	1	1	2
1	38	2	1	1	1	1	2	2	1	2
1	31	2	3	3	4	3	3	2	1	1
1	47	2	2	2	3	2	1	4	4	5
1	23	2	4	4	4	2	2	5	3	3
1	30	2	4	4	4	4	2	3	1	3
1	23	1	2	3	5	4	4	4	4	5
1	43	1	2	4	4	2	2	5	3	4
1	27	2	3	4	4	1	4	5	3	5
1	18	2	3	3	3	3	3	4	3	1
1	44	2	2	2	2	2	2	2	2	2
1	25	2	1	1	2	1	1	3	1	1
1	30	2	1	2	2	1	2	5	4	4
1	32	2	1	1	1	1	1	2	1	1
1	52	2	1	1	1	1	1	1	1	1
1	23	2	1	1	3	1	1	2	1	3
1	31	2	3	5	3	2	5	5	2	3
1	34	2	2	2	4	3	3	4	4	4
1	50	2	1	2	1	1	1	2	2	2
1	25	2	1	1	1	1	1	1	2	1
1	48	2	1	1	1	1	1	3	2	3
1	37	2	1	1	1	1	1	2	1	3
1	39	2	1	1	1	1	1	1	1	1
1	57	2	1	1	2	1	1	2	1	1
1	19	2	4	2	3	2	4	4	3	2
1	50	1	2	2	4	3	4	4	4	2
1	50	2	2	2	1	1	1	4	1	1
1	31	2	4	4	3	3	5	5	2	5
1	57	2	2	1	3	1	3	2	2	1
1	30	2	4	2	4	2	1	4	3	2
1	28	1	2	2	2	2	2	4	1	2
1	39	2	4	5	4	5	5	4	5	5
1	23	1	2	1	1	1	1	2	1	1
1	22	2	2	2	2	2	2	2	2	4
1	25	2	2	1	2	1	3	4	4	1
1	36	1	1	1	1	1	1	2	1	1
1	29	2	4	4	4	1	4	5	1	1
1	31	1	1	1	1	1	1	3	1	2
1	45	2	2	1	2	1	2	2	1	1
1	59	2	1	1	3	1	4	4	2	3
1	21	2	1	1	2	1	1	3	1	1
1	27	2	1	1	4	2	2	5	5	1
1	25	2	2	1	2	1	2	2	2	1
1	28	2	3	1	3	2	1	2	2	1
1	#NULL!	1	3	1	2	1	2	3	1	2
1	40	2	2	2	1	1	1	2	1	1
1	34	2	1	4	1	2	5	4	1	1
1	28	2	2	1	3	1	1	3	1	2
1	29	2	1	1	4	3	5	5	5	4
1	#NULL!	2	3	1	4	1	2	3	2	1
1	27	2	2	3	3	4	4	3	3	3
1	38	2	1	1	1	1	1	1	1	1
1	63	1	2	1	2	1	2	3	2	2
1	37	1	1	3	2	2	2	3	3	4
1	62	1	1	2	1	1	1	2	2	2
1	47	2	2	1	2	2	2	3	1	1
1	34	1	1	1	2	1	1	3	1	2
1	61	2	1	1	1	1	1	1	1	2
1	18	2	2	1	2	1	2	3	4	2
1	38	2	3	3	5	2	2	5	5	2
1	29	2	1	1	3	1	1	4	3	3
1	60	2	1	1	2	1	2	2	1	1
1	38	2	1	1	1	1	1	3	1	2
1	43	2	2	3	4	3	4	4	2	4
1	44	1	3	3	2	2	1	3	2	2
1	32	2	3	3	4	2	4	5	4	3
1	37	2	1	1	2	2	1	2	1	2
1	44	2	2	2	2	1	1	2	1	1
1	55	2	1	1	1	1	1	1	1	1
1	20	2	1	1	2	1	2	2	2	2
1	#NULL!	2	4	3	3	2	3	3	3	2
1	#NULL!	#NULL!	1	1	1	1	1	2	1	1
1	60	1	2	1	2	1	2	2	2	1
1	32	2	1	1	1	1	2	3	4	2
1	35	2	1	1	2	1	1	2	2	1
1	30	2	2	1	2	1	2	4	2	2
1	33	2	1	1	1	1	1	2	1	2
1	40	2	1	1	1	1	1	4	1	1
1	35	2	2	1	2	1	3	2	2	1
1	23	2	2	1	1	1	1	2	2	2
1	41	2	3	2	2	1	1	4	2	2
1	24	2	3	4	3	4	4	5	5	5
1	42	2	1	1	1	1	1	1	1	1
1	47	2	2	2	4	2	4	4	4	4
1	21	1	2	1	3	1	1	3	1	2
1	36	1	2	2	2	3	2	4	2	3
1	33	1	1	1	2	1	1	3	1	2
1	50	2	1	1	1	1	1	2	1	1
1	69	2	1	1	1	1	1	4	2	2
1	34	2	1	1	1	1	1	1	1	1
1	41	1	1	1	1	1	1	1	1	1
1	44	1	1	3	2	1	1	4	2	2
1	41	#NULL!	3	3	3	1	1	2	2	3
1	21	1	1	1	2	1	2	3	1	1
1	23	2	3	2	3	2	2	3	4	3
1	35	2	1	1	1	1	1	2	2	2
1	53	#NULL!	2	2	2	1	1	2	2	1
1	39	2	1	1	1	1	1	2	1	1
1	35	1	1	1	1	1	1	2	1	1
1	27	2	3	4	3	4	4	5	4	4
1	39	2	3	4	5	4	5	5	5	4
1	40	2	2	1	2	1	1	1	1	1
1	50	2	1	2	2	1	2	3	1	2
1	31	2	1	1	2	1	3	3	3	2
1	35	2	1	1	1	1	1	1	1	2
1	27	2	1	1	1	1	1	5	1	1
1	32	2	1	1	2	1	1	2	1	1
1	33	2	2	2	1	1	1	4	2	2
1	29	2	1	1	2	2	2	3	1	2
1	28	1	1	1	1	1	2	2	1	1
1	54	2	2	1	1	1	1	2	1	1
1	37	2	3	1	2	1	1	4	1	1
1	48	2	1	1	1	1	1	2	1	2
1	19	2	4	2	3	1	2	4	1	2
1	29	1	1	1	2	1	1	3	1	1
1	19	2	3	3	2	1	4	3	3	1
1	30	2	1	1	1	1	2	3	2	1
1	30	2	2	1	1	1	2	2	1	1
1	23	1	2	1	2	1	2	3	2	1
1	25	1	3	1	2	4	3	1	1	1
1	19	2	4	1	4	1	5	4	4	1
1	21	2	4	4	4	3	3	5	3	4
1	19	2	1	2	4	2	4	5	1	2
1	24	2	2	1	1	1	1	1	1	1
1	27	2	1	1	2	2	3	4	3	2
1	24	2	3	3	4	3	3	5	5	4
1	21	2	1	1	1	1	1	2	2	1
1	19	2	3	3	5	2	4	4	3	4
1	19	2	2	1	2	1	1	3	1	1
1	71	2	2	2	2	1	2	2	1	2
1	32	2	2	1	2	1	1	2	1	2
1	32	2	1	1	2	1	1	1	1	1
1	28	1	2	1	2	1	1	4	2	4
1	37	1	2	2	2	1	2	2	3	1
1	27	2	2	4	2	2	3	4	1	5
1	25	2	2	1	3	2	1	4	1	3
2	32	2	1	1	2	1	1	2	2	1
2	26	2	2	1	2	1	1	2	1	1
2	23	2	3	2	3	1	2	3	1	1
2	18	2	1	1	1	1	2	1	1	1
2	24	2	1	1	2	2	2	1	1	1
2	23	2	3	3	5	4	4	5	3	3
2	28	1	2	1	1	1	1	3	1	1
2	38	1	1	1	4	1	4	4	2	1
2	24	2	2	1	2	2	4	4	1	1
2	21	2	1	2	2	2	2	3	2	2
2	22	2	1	1	1	1	1	2	1	2
2	25	2	1	1	1	1	1	1	1	1
2	24	2	1	1	1	1	2	2	1	1
2	25	2	1	1	1	1	1	4	2	1
2	57	2	1	1	1	1	2	3	1	1
2	24	2	1	1	2	1	1	2	1	1
2	26	1	1	1	1	1	1	3	1	1
2	25	1	2	1	1	1	1	3	2	2
2	25	1	3	2	2	2	2	3	2	2
2	45	1	1	3	5	2	2	4	2	2
2	44	1	1	1	2	1	2	1	1	1
2	44	2	1	1	3	1	1	3	1	1
2	49	1	1	1	2	1	3	2	1	1
2	22	2	3	1	3	1	3	4	2	2
2	21	1	1	1	1	1	2	2	1	1
2	24	1	2	1	3	1	4	5	2	1
2	23	1	2	1	1	1	2	4	1	2
2	25	2	1	1	1	1	1	1	1	1
2	25	1	4	1	3	2	3	4	2	1
2	41	2	1	1	4	1	1	1	1	1
2	43	1	1	1	1	1	1	1	1	1
2	21	2	1	1	1	1	1	1	1	1
2	48	2	1	1	1	1	1	5	1	4
2	61	1	1	1	2	1	2	2	2	1
2	56	2	5	2	2	4	3	2	1	3
2	55	2	1	1	3	1	1	2	3	2
2	49	1	1	1	2	1	3	2	1	1
2	54	2	2	1	2	2	2	4	2	2
2	24	2	1	1	1	1	1	1	1	1
2	27	1	2	1	1	2	1	3	2	3
2	21	2	1	1	1	2	2	3	2	1
2	24	1	1	1	2	1	1	3	1	1
2	25	1	1	1	2	1	1	3	1	1
2	18	1	3	2	2	1	1	3	4	1
2	40	2	2	1	2	1	1	3	1	2
2	39	2	1	1	1	1	1	2	1	1
2	43	2	1	1	1	1	2	2	1	1
2	28	2	3	2	4	1	1	4	1	1
2	29	2	2	1	3	1	1	4	1	1
2	28	2	1	1	2	1	1	3	1	1
2	26	2	5	3	3	1	2	4	1	1
2	20	1	1	1	2	1	2	3	1	2
2	21	1	1	1	2	1	1	2	1	1
2	22	1	1	1	2	1	1	5	1	1
2	23	1	2	1	2	1	1	2	1	1
2	24	2	1	1	2	1	1	2	1	1
2	21	2	2	1	1	1	1	2	2	1
2	26	2	2	1	1	1	2	2	3	1
2	25	2	1	1	1	1	3	1	2	1
2	24	1	2	1	2	1	2	4	2	1
2	32	2	1	1	1	1	1	3	1	2
2	29	1	1	1	2	1	1	2	1	2
2	29	1	4	4	3	3	2	3	3	3
2	24	2	1	1	1	1	2	1	1	2
2	25	1	1	1	3	1	1	5	1	2
2	24	2	1	1	1	1	2	3	1	1
2	26	2	1	1	1	1	1	1	1	1
2	23	1	1	1	1	1	1	1	1	1
2	25	2	2	1	2	1	2	2	4	1
2	22	2	2	1	4	1	5	5	1	1
2	26	2	1	1	2	1	3	3	1	1
2	32	1	4	4	5	2	2	5	3	3
2	53	1	1	1	2	1	1	2	4	3
2	21	1	3	2	3	3	2	3	2	2
2	22	1	1	1	1	1	1	1	1	1
2	26	2	1	1	2	1	4	4	1	1
2	26	2	1	1	2	1	1	1	1	1
2	23	1	1	1	1	1	1	1	1	1
2	21	2	2	1	2	1	1	2	1	2
2	23	2	1	1	2	1	2	3	1	1
2	18	2	2	1	1	1	2	3	1	1
2	50	1	1	1	2	1	1	4	2	2
2	19	1	3	1	3	2	2	2	5	3
2	23	2	2	2	5	2	5	5	1	1
2	27	2	1	1	2	1	2	2	3	2
2	24	2	1	1	1	1	1	3	5	1
2	26	1	2	1	2	1	1	3	1	3
2	29	2	1	1	2	1	1	2	1	2
2	36	2	1	1	2	1	1	3	2	3
2	21	2	1	1	1	1	1	1	1	1
2	52	1	3	1	2	1	1	2	1	1
2	21	1	1	1	1	1	1	2	1	1
2	22	2	2	1	2	2	2	3	1	1
2	19	2	2	1	3	1	3	2	1	1
2	23	2	2	2	4	2	2	4	2	3
2	23	2	1	1	1	1	1	1	3	1
2	23	2	2	1	2	1	1	3	1	2
2	24	2	1	1	4	2	3	3	4	2
2	29	2	1	1	1	1	1	1	1	1
2	24	1	1	1	3	1	4	4	4	2
2	60	2	3	2	2	2	1	2	5	3
2	25	2	1	1	2	1	1	2	2	1
2	34	1	3	1	1	1	1	3	1	2
2	24	2	1	1	1	1	1	1	1	1
2	27	2	3	2	5	3	2	4	3	3
2	23	1	1	1	1	1	2	1	1	1
2	52	2	2	1	2	1	2	3	1	1
2	51	1	2	1	2	1	1	4	1	1
2	28	1	1	1	2	1	1	2	2	1
2	50	2	4	2	2	3	1	2	1	1
2	23	2	2	2	1	3	1	3	3	4
2	55	1	5	4	5	4	4	5	3	1
2	25	1	3	2	2	2	1	5	2	3
2	25	2	2	1	1	2	1	4	1	1
2	44	1	1	1	1	1	1	3	1	2
2	34	1	4	3	4	4	2	3	2	3
2	27	2	1	1	2	1	1	1	1	1
2	35	1	1	1	3	1	1	4	1	1
2	30	2	1	1	1	2	1	1	1	1
2	22	2	2	1	1	1	1	1	1	1
2	53	1	1	1	2	1	1	3	2	3
2	25	2	1	1	1	1	5	3	2	1
2	34	1	2	3	3	3	4	4	5	2
2	40	1	2	2	3	2	2	3	2	3
2	41	2	2	4	4	2	4	4	4	2
2	33	1	4	3	3	2	1	5	1	1
2	39	2	3	1	3	1	1	2	2	1
2	43	1	4	1	1	1	2	1	1	1
2	44	1	1	1	2	1	2	3	1	1
2	32	2	1	1	2	1	1	3	1	2
2	34	2	1	1	1	1	1	1	1	1
2	22	2	1	1	1	1	1	2	1	1
2	26	1	2	2	2	1	2	2	2	1
2	51	1	2	2	1	1	3	3	4	2
2	22	2	2	3	4	1	5	5	1	1
2	30	2	3	1	2	1	1	3	1	1
2	25	2	4	1	2	1	1	1	1	1
2	33	1	1	1	2	1	2	3	4	1
2	22	2	1	1	1	1	2	3	2	1
2	26	2	4	2	4	2	2	4	2	4
2	24	1	2	1	1	1	1	4	4	1
2	32	2	1	2	5	3	3	4	2	1
2	23	2	2	1	3	1	1	2	5	2
2	25	1	1	1	1	1	1	3	2	2
2	35	2	1	1	2	1	2	2	1	1
2	45	2	1	1	3	1	2	2	1	1
2	24	1	1	1	1	1	1	2	1	1
2	48	1	1	1	2	1	4	4	1	1
2	27	2	2	1	2	1	2	1	2	1
2	32	1	2	1	2	1	1	3	1	1
2	23	2	1	1	1	1	1	2	1	2
2	22	2	1	1	2	1	1	2	1	1
2	23	2	1	1	1	1	1	1	1	1
2	27	1	1	1	2	1	1	2	1	2
2	19	2	1	1	2	1	2	2	1	1
2	29	2	1	1	2	1	3	5	1	1
2	46	1	1	1	2	1	1	2	1	2
2	47	2	2	1	1	1	1	1	1	1
2	25	2	2	1	1	1	1	3	1	1
2	52	2	2	1	3	1	2	2	1	1
2	37	2	4	1	1	1	1	1	1	1
2	24	2	2	1	3	3	2	4	1	1
2	25	1	2	1	1	1	1	1	1	1
2	23	2	1	2	3	2	2	4	2	1
2	25	2	1	1	1	1	1	3	1	1
2	19	2	2	1	1	1	1	1	1	1
2	29	1	1	1	1	1	1	2	1	1
2	34	2	1	1	2	1	1	3	1	1
2	27	1	1	1	2	1	1	4	1	1
2	21	1	1	3	5	1	3	5	2	4
2	37	2	2	2	4	1	2	5	1	1
2	26	2	1	1	1	1	3	3	1	2
2	18	1	3	1	5	2	1	5	1	3
2	24	2	1	1	2	1	1	2	2	1
2	23	2	1	1	1	1	1	1	1	1
2	24	2	3	1	1	1	1	4	1	1
2	21	2	5	4	1	1	1	3	1	2
2	26	2	1	1	1	1	1	3	1	1
2	23	2	1	1	1	1	1	4	1	1
2	25	2	3	2	3	1	3	3	1	1
2	26	2	2	1	1	2	1	1	1	3
2	27	2	4	5	5	2	4	5	4	1
2	23	2	2	1	2	1	2	4	3	2
2	24	2	1	1	2	1	1	3	1	1
2	19	2	1	1	2	1	1	2	2	1
2	19	1	1	1	2	1	1	4	2	2
2	24	1	2	1	2	2	2	3	2	1
2	19	2	1	1	1	1	2	1	1	1
2	36	1	1	1	1	1	1	1	1	1
2	25	1	2	1	2	1	2	5	2	1
2	19	2	2	2	2	2	2	3	2	2
2	18	1	2	2	3	2	4	4	5	2
2	19	1	1	1	2	1	1	1	1	1
2	19	1	2	2	3	2	2	3	3	2
2	23	2	1	1	3	1	1	2	1	1
2	22	1	1	1	2	1	1	3	2	1
2	27	1	1	1	1	1	1	1	1	1
2	19	2	2	1	3	1	1	2	1	1
2	18	1	1	1	2	1	1	1	1	2
2	19	2	1	1	3	1	1	3	2	1
2	19	2	2	4	5	4	5	4	4	3
2	18	2	1	1	1	1	1	3	3	1
2	20	2	4	2	5	1	2	5	1	1
2	18	2	3	2	2	3	2	3	2	1
2	18	2	4	3	5	1	3	5	3	2
2	19	1	2	1	3	2	2	4	3	3
2	20	2	2	1	1	1	2	2	1	1
2	19	1	2	1	2	1	1	4	1	2
2	20	2	2	1	2	1	2	4	4	1
2	18	1	1	1	1	1	1	1	5	1
2	19	2	1	2	1	1	1	3	1	1
2	18	2	3	2	3	1	4	5	5	4
2	19	2	3	1	4	2	5	5	3	1
2	21	2	1	1	1	1	1	1	1	1
2	22	2	2	4	4	3	2	3	3	4
2	23	1	1	1	2	1	1	3	1	2
2	18	2	1	1	2	1	1	5	1	1
2	19	1	4	5	5	1	1	4	4	1
2	20	2	4	5	5	4	4	5	4	3
2	24	2	1	1	2	2	1	3	1	3
2	22	1	2	1	2	1	2	2	1	1
2	21	1	1	1	2	1	1	2	2	1
2	19	2	5	5	5	5	5	5	4	5
2	18	2	1	1	3	2	1	4	1	1
2	19	1	4	4	4	4	3	5	4	2
2	23	2	3	1	1	1	1	4	2	2
2	18	1	1	1	1	1	1	2	1	1
2	20	2	3	2	2	3	3	4	2	1
2	18	2	1	1	1	1	1	3	3	1
2	20	2	1	2	3	1	1	3	3	2
2	19	2	4	1	2	1	1	1	1	1
2	23	2	2	2	3	2	2	2	2	1
2	27	2	1	1	4	1	1	2	1	1
2	18	2	1	2	1	3	1	1	1	2
2	22	2	2	2	4	2	2	5	2	2
2	18	1	1	1	1	1	2	1	2	2
2	18	2	1	1	1	1	1	1	1	1
2	18	1	3	3	5	3	3	5	2	1
2	18	1	2	2	3	2	2	4	3	2
2	18	2	1	1	2	1	4	5	1	3
2	18	1	1	1	1	1	1	1	1	1
2	18	2	1	1	1	1	1	1	1	1
2	18	2	2	3	4	2	4	5	1	2
2	18	2	1	1	2	1	1	4	1	4
2	18	2	2	1	1	1	2	3	2	1
2	18	1	2	1	3	1	1	5	2	1
2	18	2	2	1	3	1	2	4	2	3
2	23	2	1	1	2	1	1	3	1	1
2	21	1	2	1	2	1	1	3	1	2
2	20	2	2	2	3	1	1	4	2	3
2	18	2	2	1	1	1	2	3	1	1
2	18	2	2	1	3	1	2	3	2	3
2	20	1	3	1	2	1	1	4	2	4
2	18	1	1	1	4	1	1	4	1	1
2	18	2	1	1	3	1	1	3	1	1
2	18	1	3	1	2	1	1	3	1	1
2	19	2	2	1	2	1	2	2	2	2
2	18	1	2	3	4	1	3	4	2	1
2	18	2	1	3	3	2	2	4	2	2
2	18	2	2	1	4	1	1	5	3	1
2	18	2	2	1	3	1	1	3	4	5
2	18	2	3	4	5	3	3	5	5	2
2	19	2	3	3	4	3	3	2	3	1
2	18	2	4	1	2	1	1	2	1	2
2	25	2	2	1	4	1	1	4	1	1
2	45	2	1	1	1	1	1	1	1	2
2	18	1	1	1	1	1	1	1	1	1
2	23	2	1	1	2	1	4	5	1	5
2	18	2	2	1	4	2	3	3	1	2
2	31	2	2	1	1	1	1	2	2	2
2	18	2	1	1	2	1	2	2	1	2
2	18	2	1	2	2	1	2	2	1	1
2	18	2	1	1	4	1	1	4	2	2
2	18	2	2	1	2	1	3	2	2	1
2	51	2	1	1	1	1	1	1	1	1
2	21	2	2	2	3	2	2	3	3	3
2	20	2	1	1	2	1	1	3	1	1
2	18	2	2	1	2	1	1	3	1	1
2	19	2	3	2	1	2	1	3	2	2
2	18	1	2	1	1	1	1	1	1	1
2	18	2	3	2	1	3	2	1	1	1
2	18	2	1	1	2	1	2	2	1	1
2	25	1	1	1	1	1	1	1	1	1
2	21	2	2	2	3	2	1	5	2	1
2	18	2	2	2	2	1	5	5	1	5
2	18	2	1	1	1	1	2	2	2	4
2	29	1	2	1	1	1	2	3	2	1
2	21	2	1	1	3	1	1	3	1	1
2	18	2	1	2	2	1	2	3	4	4
2	23	2	1	1	1	1	1	2	1	1
2	18	2	1	1	1	1	1	1	1	1
2	23	2	1	1	1	1	1	1	1	1
2	20	2	1	1	2	1	1	2	2	1
2	20	1	3	1	3	1	1	2	1	2
2	22	2	2	1	3	1	4	5	3	1
2	19	1	1	1	2	1	2	2	1	1
2	18	2	1	1	1	1	1	3	1	2
2	18	2	1	1	2	1	1	2	3	1
2	18	1	1	1	1	1	1	2	1	4
2	21	1	2	2	2	2	4	5	5	3
2	19	2	2	1	2	2	2	3	1	1
2	22	1	2	1	1	1	1	4	2	2
